# Supplementary material for: Usefulness of ß-d-Glucan Assay for the First-Line Diagnosis of Pneumocystis Pneumonia and for Discriminating between Pneumocystis Colonization and Pneumocystis Pneumonia
Source: MDPI journal article supplement (doi:10.3390/jof8070663), 2022-06-24
Supplement: s1 [file s1]

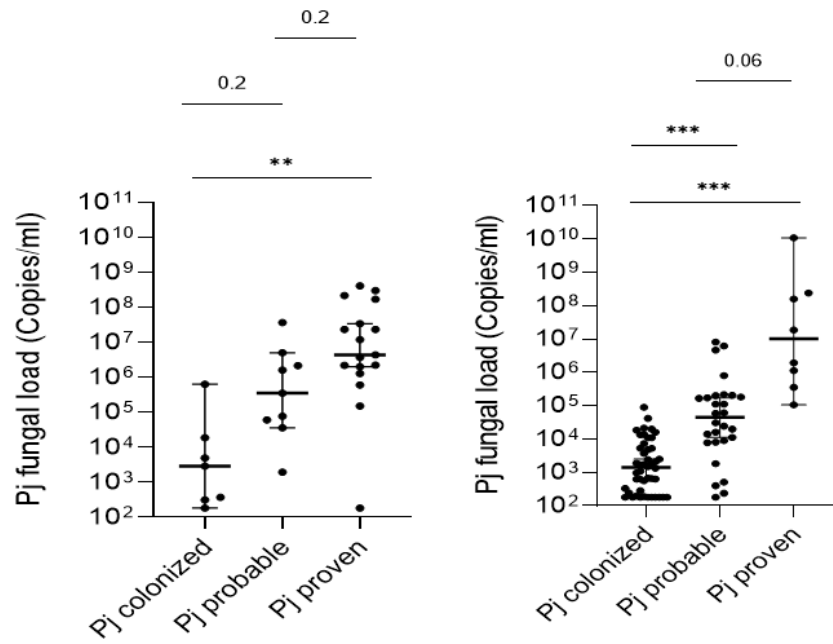

Figure S1. Comparison of Pj fungal load (median and CI 95) in episodes of proven PjP, probable PjP and Pj colonization according to HIV-status of the patient. (a) episodes occurring in HIV-positive patients and (b): in HIV-negative patients. Comparison of the three groups was analyzed using Kruskal-Wallis test followed by Dunn's multiple comparison test. \* < 0.001, \*\* < 0.0001.
